RESEARCH ARTICLE

# Genome-Wide DNA Methylation Analysis and Epigenetic Variations Associated with Congenital Aortic Valve Stenosis (AVS)

Uppala Radhakrishna<sup>1\*</sup>, Samet Albayrak<sup>2</sup>, Zeynep Alpay-Savasan<sup>1</sup>, Amna Zeb<sup>1</sup>, Onur Turkoglu<sup>1</sup>, Paul Sobolewski<sup>1</sup>, Ray O. Bahado-Singh<sup>1</sup>

**1** Department of Obstetrics and Gynecology, Oakland University William Beaumont School of Medicine, Royal Oak, Michigan, United States of America, **2** Department of Obstetrics and Gynecology, Wayne State University School of Medicine, Detroit, Michigan, United States of America

\* [Uppala.radhakrishna@beaumont.edu](mailto:Uppala.radhakrishna@beaumont.edu)

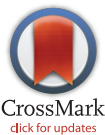

**OPEN ACCESS**

**Citation:** Radhakrishna U, Albayrak S, Alpay-Savasan Z, Zeb A, Turkoglu O, Sobolewski P, et al. (2016) Genome-Wide DNA Methylation Analysis and Epigenetic Variations Associated with Congenital Aortic Valve Stenosis (AVS). PLoS ONE 11(5): e0154010. doi:10.1371/journal.pone.0154010

**Editor:** Sunil K Ahuja, South Texas Veterans Health Care System and University Health Science Center San Antonio, UNITED STATES

**Received:** May 28, 2015

**Accepted:** April 7, 2016

**Published:** May 6, 2016

**Copyright:** © 2016 Radhakrishna et al. This is an open access article distributed under the terms of the [Creative Commons Attribution License](https://creativecommons.org/licenses/by/4.0/), which permits unrestricted use, distribution, and reproduction in any medium, provided the original author and source are credited.

**Data Availability Statement:** All relevant data are within the paper and its Supporting Information files. There is no other data set to be uploaded to any or to a public repository.

**Funding:** The present study was supported by Beaumont Health System, Royal Oak, Michigan; however, no grant number is available.

**Competing Interests:** The authors have declared that no competing interests exist.

## Abstract

Congenital heart defect (CHD) is the most common cause of death from congenital anomaly. Among several candidate epigenetic mechanisms, DNA methylation may play an important role in the etiology of CHDs. We conducted a genome-wide DNA methylation analysis using an Illumina Infinium 450k human methylation assay in a cohort of 24 newborns who had aortic valve stenosis (AVS), with gestational-age matched controls. The study identified significantly-altered CpG methylation at 59 sites in 52 genes in AVS subjects as compared to controls (either hypermethylated or demethylated). Gene Ontology analysis identified biological processes and functions for these genes including positive regulation of receptor-mediated endocytosis. Consistent with prior clinical data, the molecular function categories as determined using DAVID identified low-density lipoprotein receptor binding, lipoprotein receptor binding and identical protein binding to be over-represented in the AVS group. A significant epigenetic change in the *APOA5* and *PCSK9* genes known to be involved in AVS was also observed. A large number CpG methylation sites individually demonstrated good to excellent diagnostic accuracy for the prediction of AVS status, thus raising possibility of molecular screening markers for this disorder. Using epigenetic analysis we were able to identify genes significantly involved in the pathogenesis of AVS.

## Introduction

Congenital heart defect (CHD) is the most common type of birth defect, and affects close to 1% of all live births [1, 2]. Over 50% of children born with CHD will have at least one invasive surgery in their lifetime, while many will have multiple surgeries. In the US, approximately 20–30% of all infants with CHD have valve defects [3, 4].

The etiology of CHD is multifactorial and complex. Approximately 30% of children with a chromosomal abnormality have associated CHD [5]; however, a majority of CHD cases have no identifiable genetic abnormality. Families with autosomal dominant [6], recessive [7] and X-linked [8] CHD have been reported; however, in the majority of cases genetic mechanisms have not heretofore been identified. It is postulated that sporadic CHD, which accounts for

around 80% of all cases, arises from an interaction of genetic and environmental factors [9]. Gestational diabetes, dietary deficiency, medication use, maternal age, cigarette smoking, obesity, febrile illnesses in pregnancy, alcohol intake and viral infections have been reported as maternal-environmental risk factors for the development of CHD [10]. The exact mechanisms by which these factors cause CHD remain unknown.

At least 18 distinct types of congenital heart defects are recognized; among these aortic valve stenosis (AVS) is one of the most common and most serious valve disease that has strong genetic basis [11, 12]. Congenital AVS, defined as incomplete obstruction of the valve orifice, is an important category of structural heart defect, and occurs in 3–6% of such cases [13]. There is variability in both the site of obstruction and severity of the obstruction. Sites of obstruction are sub-classified as valvular, subvalvular and supra-valvular [14]. About half of infants with severe AVS require surgery [15]. Mild aortic stenosis is difficult to detect prenatally; however, critical aortic stenosis can lead to left ventricular myocardial dysfunction with endocardial fibroelastosis, left atrial dilation and narrowing of the aortic root [16]. These changes can be a prelude to the development of hypoplastic left heart syndrome. The present standard for prenatal screening is mostly based the use of ultrasonography and there is no reliable biologic screening marker for any type of CHD [17].

Recently, some studies have identified an association between dietary folate supplementation and decreased CHD risk [18]. Deficiency in folate is known to result in hyperhomocysteinemia, another risk factor for CHD development [19]. Folate is a B-vitamin that supplies the methyl group for DNA methylation and for other methylation reactions in the cell. Such findings are consistent with a role for epigenetic DNA methylation in the development of CHD. In a recently conducted genome-wide DNA-methylation analysis, we reported evidence of significantly altered CpG methylation levels genome-wide in multiple categories of CHD compared to controls. The study included cases of hypoplastic left heart syndrome, Teratology of Fallot, ventricular septal defect, atrial septal defect and coarctation of the aorta [20].

The prenatal and newborn detection of CHD remains a significant challenge [21, 22]. We undertook a study to examine genome-wide DNA methylation patterns in newborns with AVS to identify genomic regions containing disease-related genes and epigenetic changes that may contribute to CHD pathophysiology. An important objective of the study was to identify DNA methylation biomarkers, serum molecules that could potentially be used in the future for risk estimation and detection of AVS.

## Materials and Methods

Genomic DNA was obtained from neonatal dried blood spots using commercial DNA extraction kits (Qiagen QIAamp<sup>®</sup>) according to manufacturer's protocol. Many studies have reported genome-wide DNA methylation profiles from archived dried blood spots using the Infinium HumanMethylation450 BeadChip as a suitable template [23, 24]. Blood spot specimens were collected previously for the mandated newborn screening and treatment program run by the Michigan Department of Community Health in the State of Michigan (MDCH). All specimens were collected between 24 and 79 hours after birth. Parents/legal guardians were aware at the time of blood collection that residual blood spots after clinical testing may be utilized for research pending review of such study requests by the MDCH. This study was approved by both the institutional review boards from William Beaumont Hospital and the MDCH. Limited demographic information was available for each subject including date of sample collection, maternal age and race, gestational age at delivery and newborn sex along with the type of CHD anomaly. Suspected or diagnosis-unknown AVS cases were excluded. Unaffected controls had no reported medical disorder and were matched for birth weight,

gestational age at delivery, ethnicity, year of birth, and interval from specimen collection to testing. Our cohort included 24 AVS subjects and 24 controls. All specimens were de-identified by removal of further protected health information and researchers were masked to subject identity. Details of the case control cohort are available in [S1 Table](#).

## Genome-wide methylation analysis using the HumanMethylation450

Genome-wide methylation analysis was performed for 48 individuals (24 AVS subjects and 24 controls) using the HumanMethylation450, Illumina's newest Infinium® HD BeadChip assay for methylation (Illumina, Inc., California, USA), which contains 485,577 methylation sites and requires only 500 ng of genomic DNA. These sites are equally distributed in the genome and represent 96% of RefSeq genes, 95% of CpG islands and an average of 17 CpG sites per covered gene region including the promoter, 5'UTR, coding, and 3'UTR regions. DNA methylation profiling using Illumina Infinium technology with peripheral blood lymphocytes has been used to identify CpG sites associated with disease states [25, 26].

The DNA samples were bisulfite converted using the EZ DNA Methylation-Direct Kit (Zymo Research, Orange, CA) according to the manufacturer's protocol. The fluorescently stained BeadChips were imaged by the Illumina iScan. Prior to detailed bioinformatic and statistical analysis, data preprocessing and quality control was performed including examination of the background signal intensity of both affected and negative controls, the methylated and unmethylated signals, and ratio of the methylated and unmethylated signal intensities. The processing is done fully according to manufacturer's protocol and 99% of the CpG loci are determined unequivocally.

## Statistical and Bioinformatic analysis

Genome-wide, gene-specific DNA methylation was measured using the Genome Studio methylation analysis package (Illumina). Following the pre-processing described above, a DNA methylation  $\beta$ -value was assigned to each CpG site. Differential methylation was assessed by comparing the  $\beta$ -values per individual nucleotide at each CpG site between AVS subjects and controls. In order to avoid potential confounding factors, probes associated with sex chromosomes and/or containing SNPs in the probe sequence (listing dbSNP entries near or within the probe sequence, i.e., within 10 bp of the CpG site) were excluded from further analysis [27–29]. Probes targeting CpG loci associated with SNPs near or within the probe sequence may influence corresponding methylated probes [30]. The remaining CpG sites were taken forward for analysis.

The most discriminating 59 CpG sites were selected based on the pre-set cutoff criteria of >1.5-fold increase and/or >1.5-fold decrease with  $p < 0.05$ . These sites include the highest 46 hypermethylated and top 13 demethylated CpG sites for further analysis. The identified genes are listed in [Table 1](#). The 59 CpG sites, corresponding to 52 genes, were differentially methylated either in the coding and/or promoter regions and were subsequently used to generate a heatmap using the ComplexHeatmap (v1.6.0) R package (v3.2.2). We have used ward distance for the hierarchical clustering of samples [31] ([Fig 1](#)). Subsequently these 59 CpG sites were used to calculate receiver operating characteristic (ROC) curves and the area under the ROC curves (ROC AUC).

## Validation of methylation status by bisulfite sequencing

To confirm the results obtained from the Illumina HumanMethylation450 arrays, we performed pyrosequencing analysis of bisulphite-converted DNA with appropriate oligos using the PyroMark Q24 System and advanced CpG Reagents (Qiagen®).

**Table 1. Highly Differentially Methylated CpG sites in Aortic Stenosis subjects.** Differentially methylated genes with Target ID, Gene ID, chromosome location, % methylation change and FDR p-value for each gene methylated. CpG sites with significant FDR p-value indicating methylation status and ROC AUC  $\geq 0.75$  appear to have a strong potential as diagnostic biomarkers for AVS.

|    | Target ID  | Gene Sym | Chr | % m Change | FDR p-value | AUC  |
|----|------------|----------|-----|------------|-------------|------|
| 1  | cg10818676 | DUSP27   | 1   | 37.77      | 6.98E-28    | 0.72 |
| 2  | cg21498547 | DLGAP2   | 8   | 24.36      | 5.50E-25    | 0.70 |
| 3  | cg16464924 | GAA      | 17  | 38.33      | 6.17E-27    | 0.75 |
| 4  | cg08422420 | SDHAP3   | 5   | 19.69      | 2.19E-10    | 0.67 |
| 5  | cg24960960 | SDHAP3   | 5   | 16.57      | 1.00E-07    | 0.66 |
| 6  | cg08778598 | SDHAP3   | 5   | 22.18      | 1.67E-09    | 0.64 |
| 7  | cg11787167 | NPAS3    | 14  | 21.09      | 2.90E-10    | 0.67 |
| 8  | cg03748376 | OR2L13   | 1   | 21.70      | 6.75E-10    | 0.61 |
| 9  | cg04028570 | OR2L13   | 1   | 21.63      | 5.12E-13    | 0.68 |
| 10 | cg08600378 | PRHOXNB  | 13  | 22.86      | 3.02E-19    | 0.73 |
| 11 | cg00045070 | PCSK9    | 1   | 21.65      | 7.98E-16    | 0.67 |
| 12 | cg12556569 | APOA5    | 11  | 18.95      | 2.17E-14    | 0.65 |
| 13 | cg04836786 | HLTF     | 3   | 5.68       | 0.1640      | 0.76 |
| 14 | cg00071565 | ODC1     | 2   | 2.98       | 0.5085      | 0.64 |
| 15 | cg23622369 | HSD17B1  | 17  | 4.47       | 0.3173      | 0.60 |
| 16 | cg05890887 | RPL9     | 4   | 2.47       | 0.2188      | 0.80 |
| 17 | cg11032634 | TXNRD2   | 22  | 4.11       | 0.3061      | 0.62 |
| 18 | cg03205258 | TXNRD2   | 22  | 3.83       | 0.1066      | 0.60 |
| 19 | cg26473478 | C6orf136 | 6   | 5.64       | 0.1647      | 0.69 |
| 20 | cg04146011 | FBXL6    | 8   | 3.07       | 0.4184      | 0.55 |
| 21 | cg26196700 | SORD     | 15  | 4.62       | 0.1051      | 0.75 |
| 22 | cg22801400 | HECTD2   | 10  | 3.96       | 0.3084      | 0.53 |
| 23 | cg26303934 | C7orf50  | 7   | 6.06       | 0.0640      | 0.61 |
| 24 | cg08082908 | C7orf50  | 7   | 4.27       | 0.0605      | 0.64 |
| 25 | cg27153400 | ISOC2    | 19  | 5.76       | 0.1693      | 0.61 |
| 26 | cg04307831 | CNST     | 1   | 5.14       | 0.2136      | 0.59 |
| 27 | cg27307781 | CBR1     | 21  | 5.43       | 0.0177      | 0.53 |
| 28 | cg12741994 | CLDN11   | 3   | 4.95       | 0.0325      | 0.61 |
| 29 | cg09085632 | PPP2R1B  | 11  | 3.42       | 0.1617      | 0.52 |
| 30 | cg07662121 | MPV17L   | 16  | 8.32       | 0.0123      | 0.62 |
| 31 | cg05845592 | SULT1A1  | 16  | 5.79       | 0.1174      | 0.50 |
| 32 | cg13885357 | KRT3     | 12  | 9.17       | 0.0112      | 0.68 |
| 33 | cg22469274 | HOXA6    | 7   | 6.79       | 0.0543      | 0.76 |
| 34 | cg17994139 | HOXA6    | 7   | 6.21       | 0.0519      | 0.70 |
| 35 | cg14044640 | HOXA6    | 7   | 7.56       | 0.0033      | 0.69 |
| 36 | cg00994804 | RUNX1    | 21  | 9.74       | 0.0013      | 0.76 |
| 37 | cg07169764 | MCM6     | 2   | 6.86       | 0.0003      | 0.51 |
| 38 | cg19499452 | PACS2    | 14  | 7.86       | 0.0345      | 0.67 |
| 39 | cg22093805 |          | 4   | 7.03       | 0.0158      | 0.51 |
| 40 | cg15128141 | GALNT9   | 12  | 10.81      | 0.0009      | 0.71 |
| 41 | cg18532727 | C17orf51 | 17  | 7.99       | 2.15E-05    | 0.61 |
| 42 | cg23763647 | AKR1E2   | 10  | 8.50       | 1.01E-09    | 0.74 |
| 43 | cg19865561 | MICB     | 6   | 9.33       | 5.63E-05    | 0.60 |
| 44 | cg22618164 | WDR66    | 12  | 10.79      | 0.0003      | 0.55 |
| 45 | cg21171335 | WDR66    | 12  | 9.91       | 0.0005      | 0.51 |

(Continued)

Table 1. (Continued)

|    | Target ID  | Gene Sym | Chr | % m Change | FDR p-value | AUC  |
|----|------------|----------|-----|------------|-------------|------|
| 46 | cg02981003 | GPR123   | 10  | 13.27      | 6.83E-08    | 0.57 |
| 47 | cg21931717 | SDHAP3   | 5   | 14.60      | 4.22E-08    | 0.68 |
| 48 | cg07508773 | WDSUB1   | 2   | 7.56       | 0.0002      | 0.51 |
| 49 | cg21544437 |          | 2   | 9.72       | 0.0001      | 0.69 |
| 50 | cg02583546 | C14orf4  | 14  | 8.76       | 0.0085      | 0.54 |
| 51 | cg25114630 | CHSY1    | 15  | 8.36       | 0.0089      | 0.54 |
| 52 | cg24834873 | ANKRD34B | 5   | 16.61      | 2.35E-07    | 0.69 |
| 53 | cg23307264 | KHSRP    | 19  | 6.24       | 1.61E-05    | 0.60 |
| 54 | cg10975354 | VPS13A   | 9   | 9.10       | 1.15E-10    | 0.67 |
| 55 | cg13523718 | PTPRN2   | 7   | 8.36       | 5.62E-15    | 0.68 |
| 56 | cg24668570 | KNDC1    | 10  | 21.19      | 1.30E-37    | 0.70 |
| 57 | cg22355889 | ELMOD1   | 11  | 15.01      | 1.36E-13    | 0.55 |
| 58 | cg11035303 | ANO10    | 3   | 12.95      | 4.43E-09    | 0.61 |
| 59 | cg01818594 | AIMP1    | 4   | 9.31       | 9.29E-06    | 0.61 |

doi:10.1371/journal.pone.0154010.t001

The p-value for methylation differences between case and normal groups at each locus was calculated as previously described [32]. Filtering criteria for p-values were set at <0.05 and also <0.01 in order to identify the most differentiating cytosines. P-values were calculated with and without Benjamini and Hochberg False Discovery Rate (FDR) correction for multiple testing [33]. The Benjamini and Hochberg correction tolerates more false positive genes than the Bonferroni correction.

Further analysis of the differentially methylated genes was conducted for potential biological significance. ROC curves and ROC AUC were calculated to determine the diagnostic accuracy of specific cytosine loci to differentiate AVS from control groups. Data were normalized using the Controls Normalization Method.

### Gene ontology analysis and functional enrichment

The genes found to be differentially methylated (at FDR p-value < 0.01) were uploaded to the web-based functional annotation tool DAVID V67 (DAVID/EASE, WebGestalt) for Gene Ontology analysis [34, 35] including gene ID conversion, bio-pathways analysis, and the molecular functions of methylated and unmethylated regions. Literature data mining for co-occurrence of gene names and keywords of interest was performed using Chilobot. Only genes for which Entrez identifiers were available were further analyzed. Pathway analysis was carried out using Ingenuity pathway analysis (Ingenuity Systems). Over-represented canonical pathways, biological processes and molecular processes were identified.

### Web Resources

The URLs for data presented herein are as follows:

Illumina: <http://www.illumina.com/>

Genome Studio: [http://www.solexa.com/gsp/genomestudio\\_software.ilmn](http://www.solexa.com/gsp/genomestudio_software.ilmn)

Ensemble: <http://www.ensembl.org/>

UCSC: <http://genome.ucsc.edu/>

NCBI: <http://www.ncbi.nih.gov/>

DAVID/EASE: <http://david.abcc.ncifcrf.gov/>

Web Gestalt: <http://genereg.ornl.gov/webgestalt/>

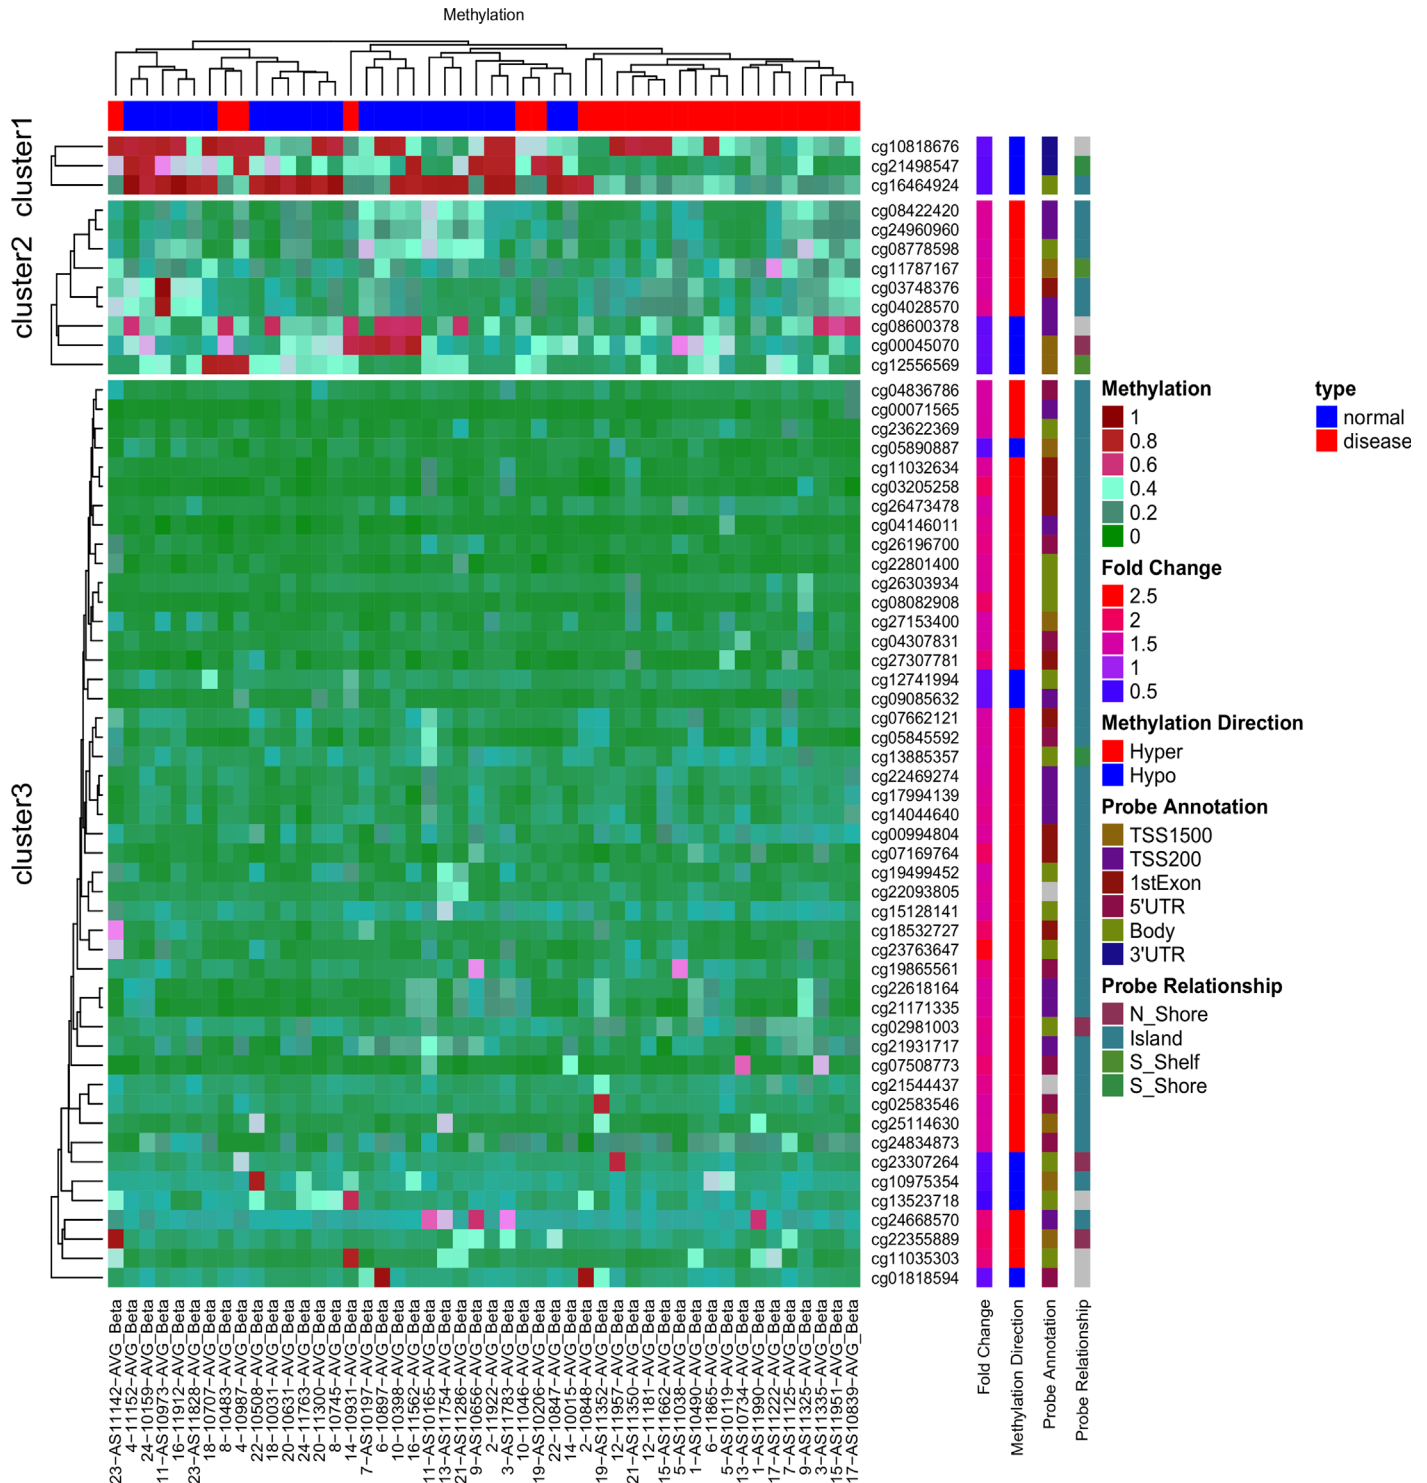

**Fig 1. Heatmap of unsupervised hierarchical clustering of AVS data on the basis of 59 differentially methylated CpG sites.** Unsupervised hierarchical clustering analysis is very popular in identifying methylation-defined patient sub-groups. Fig 1 displays CpG sites that are at least either 1.5 fold demethylated or 1.5 fold hypermethylated in the disease (AVS) condition (red colored squares) compared to normal subjects (blue colored squares). Differentially methylated CpG sites have been displayed in three clusters (row-wise). The figure also displays direction, fold change in disease, probe relationship and probe annotation of differentially methylated CpG sites. Red color in the heatmap indicates hyper DNA-methylation, and blue hypo DNA-methylation values.

doi:10.1371/journal.pone.0154010.g001

Chilibot: [www.chilibot.net](http://www.chilibot.net)

Ingenuity Systems: [www.ingenuity.com](http://www.ingenuity.com)

Online Mendelian Inheritance in Man (OMIM): <http://www.ncbi.nlm.nih.gov/Omim/>

## Results

There were no differences in gestational age at birth in weeks: mean (SD) 38.75 (1.42) in AVS subjects vs. 38.88 (1.19) in controls ( $p = 0.743$ ), nor in the timing of specimen collection after birth (in hours): mean (SD) 31.042 (11.86) in AVS subjects vs. 32.46 (8.62) in controls ( $p = 0.638$ ). There were no variations in maternal age: mean (SD) 29.87 (4.56) in AVS subjects vs. 29.87 (4.56) years in controls ( $p$ -value 1.00). Finally, maternal race and newborn gender were matched for analysis. Of the 52 genes identified during genome-wide methylation analysis, hierarchical clustering analysis demonstrated ~10 as novel principal candidate genes that are commonly methylated and whose methylation was associated with altered gene expression in AVS individuals. [Table 1](#) includes the most significantly differentially methylated CpG sites based on FDR-corrected  $p$ -values. The methylation status is represented as percentage methylation for a given probe in the sample. A positive '% m Change' value indicates an average increase in methylation status in AVS subjects compared to control samples. Similarly, a negative '% m Change' value indicates a decrease in methylation status in AVS subjects compared to controls. The  $p$ -value indicates the significance of the differential methylation levels. The University of California Santa Cruz (UCSC) gene name and genomic location of the C in the CG dinucleotide and the chromosome on which it is located as provided by Illumina are also shown in [Table 1](#). The results obtained from the DAVID Pathway and Gene Ontology over-representation analysis for canonical pathways and for biological processes are presented in [Table 2](#). Gene Set Enrichment analysis using multiple computational tools showed no significant functional enrichment due to the relatively small size of the gene list. Therefore Gene Ontology information for all genes given in the list was obtained and classified. DAVID pathway analysis software was used to identify molecular pathways associated with genes having differentially methylated CpG sites between AVS subjects and controls. Analysis was done on genes with at least one differentially methylated CpG site based on the uncorrected  $p$ -values.

In combination with the FDR  $p$ -value indicating methylation status, the area under the ROC curves can be used to distinguish AVS subjects from controls. All data cleaning and analysis was performed using R (version 3.2.3) and RStudio (version 0.99.489). The CpG sites corresponding to the 52 differentially methylated genes have a ROC AUC  $\geq 0.50$  including six CpG sites with ROC AUC  $\geq 0.75$ : cg16464924 (AUC 0.75; 95% CI, 0.62 to 0.89), cg05890887 (AUC 0.80; 95% CI, 0.68 to 0.93), cg26196700 (AUC 0.75; 95% CI, 0.61 to 0.81), cg22469274 (AUC 0.76; 95% CI, 0.63 to 0.90), cg00994804 (AUC 0.76; 0.62 to 0.89), cg04836786 (AUC 0.76; 0.63 to 0.90). At each locus, the FDR  $p$ -value for methylation difference between AVS subjects and controls was highly significantly different. ROC curve analysis ([Fig 2](#)) narrowed down the number of markers commonly methylated in AVS for the development and further consideration of their role and validation and also possible use as biomarkers.

Biological processes and molecular function determination for these genes are shown in [Table 2](#). Genes were further grouped according to their Gene Ontology-characterized function. Two genes were identified whose biological processes (*APOA5* *PCSK9*) have known molecular function (*AIMP1*, *PCSK9*, *TXNRD2*, *CLDN11*, *RUNX1*, *MCM6*, *APOA5* and *PCSK9*).

## Discussion

We have presented genome-wide differential methylation analysis of AVS subjects. To our knowledge, this is the first study that has performed an array-based genome-wide high

**Table 2. Over-represented Gene Ontology Molecular Function and Biological Process categories as determined using DAVID Categories: AVS.** Biological Process and Metabolic Function categories for over-represented pathways determined using DAVID Pathway and Gene Ontology analysis

| Category           | Term       | Term Description                                     | # of hypo and hyper methylated genes annotated to the term | %of hypo and hyper methylated genes annotated to the term | p-Value | Genes                                      |
|--------------------|------------|------------------------------------------------------|------------------------------------------------------------|-----------------------------------------------------------|---------|--------------------------------------------|
| Biological Process | GO:0048260 | Positive regulation of receptor-mediated endocytosis | 2                                                          | 4.17                                                      | 0.02    | APOA5 PCSK9                                |
| Biological Process | GO:0048259 | Regulation of receptor-mediated endocytosis          | 2                                                          | 4.17                                                      | 0.04    | APOA5 PCSK9                                |
| Molecular Function | GO:0042802 | Identical protein binding                            | 6                                                          | 12.5                                                      | 0.02    | AIMP1 PCSK9<br>TXNRD2 CLDN11<br>RUNX1 MCM6 |
| Molecular Function | GO:0050750 | low-density lipoprotein receptor binding             | 2                                                          | 4.17                                                      | 0.03    | APOA5 PCSK9                                |
| Molecular Function | GO:0070325 | lipoprotein receptor binding                         | 2                                                          | 4.17                                                      | 0.04    | APOA5 PCSK9                                |

doi:10.1371/journal.pone.0154010.t002

resolution DNA methylation in a cohort of AVS newborns. We found that epigenetic alteration of CpG sites exhibits a relationship with AVS phenotype, not only of those located within the CpG islands in the promoter region of genes, but also of those distributed throughout the gene including 5' UTR, coding, and 3'UTR regions. Recent work by our group [20] found a strong association between CpG methylation changes and the presence of multiple different types of CHD. Another recently published study reported DNA methylation changes in patients with Tetralogy of Fallot (TOF) using MassARRAY-based quantitative methylation analysis [36]. That study was, however, limited to targeted promoter regions. Taken together, these studies provide evidence that DNA methylation may be critical in the genetic and environmental interactions underlying cardiac morphogenesis. We have identified 59 CpG sites based on either at least 1.5 fold demethylation or 1.5 fold hypermethylation in disease samples. We hypothesize from the present study that altered expression of one or a combination of the 52 genes corresponding to the 59 CpG sites identified by differential methylation analysis is likely to be responsible for AVS.

There is a well-established and known association between defects in receptor-mediated endocytosis and many diseases such as hypercholesterolemia, a condition characterized by very high levels of cholesterol in the blood. Higher levels of total cholesterol increase the risk of cardiovascular disease [37, 38] including aortic valve stenosis [39] and a high risk for heart disease even in childhood. The report by Chui et al [40] also showed significantly higher serum total cholesterol concentrations in patients with aortic stenosis than in controls. However, molecular mechanisms responsible for the association of hypercholesterolemia with CHD in offspring remain unknown. In the present study, the identification of multiple genes modified in AVS indicates that the phenotype is a complex trait.

*DUSP27* (Dual Specificity Phosphatase 27 (Putative)) is a protein coding gene that belongs to the dual-specificity phosphatase (*DUSPs*) family of proteins. These proteins play important roles in a number of cell types and events, but are preferentially expressed in the heart and skeletal muscles. Li [41] conducted a *Dusp27* knockdown experiment using siRNA to study its effect on myogenic differentiation. These experiments identified this gene's important role during muscle and heart development. Together, these findings indicate that *Dusp27* may have a more important function in these two tissues. Arrington et al. [42] conducted exome sequencing of DNA samples from multiple affected family members with diverse CHDs and identified gene variations in *DUSP27* among the 18 variations they noted.



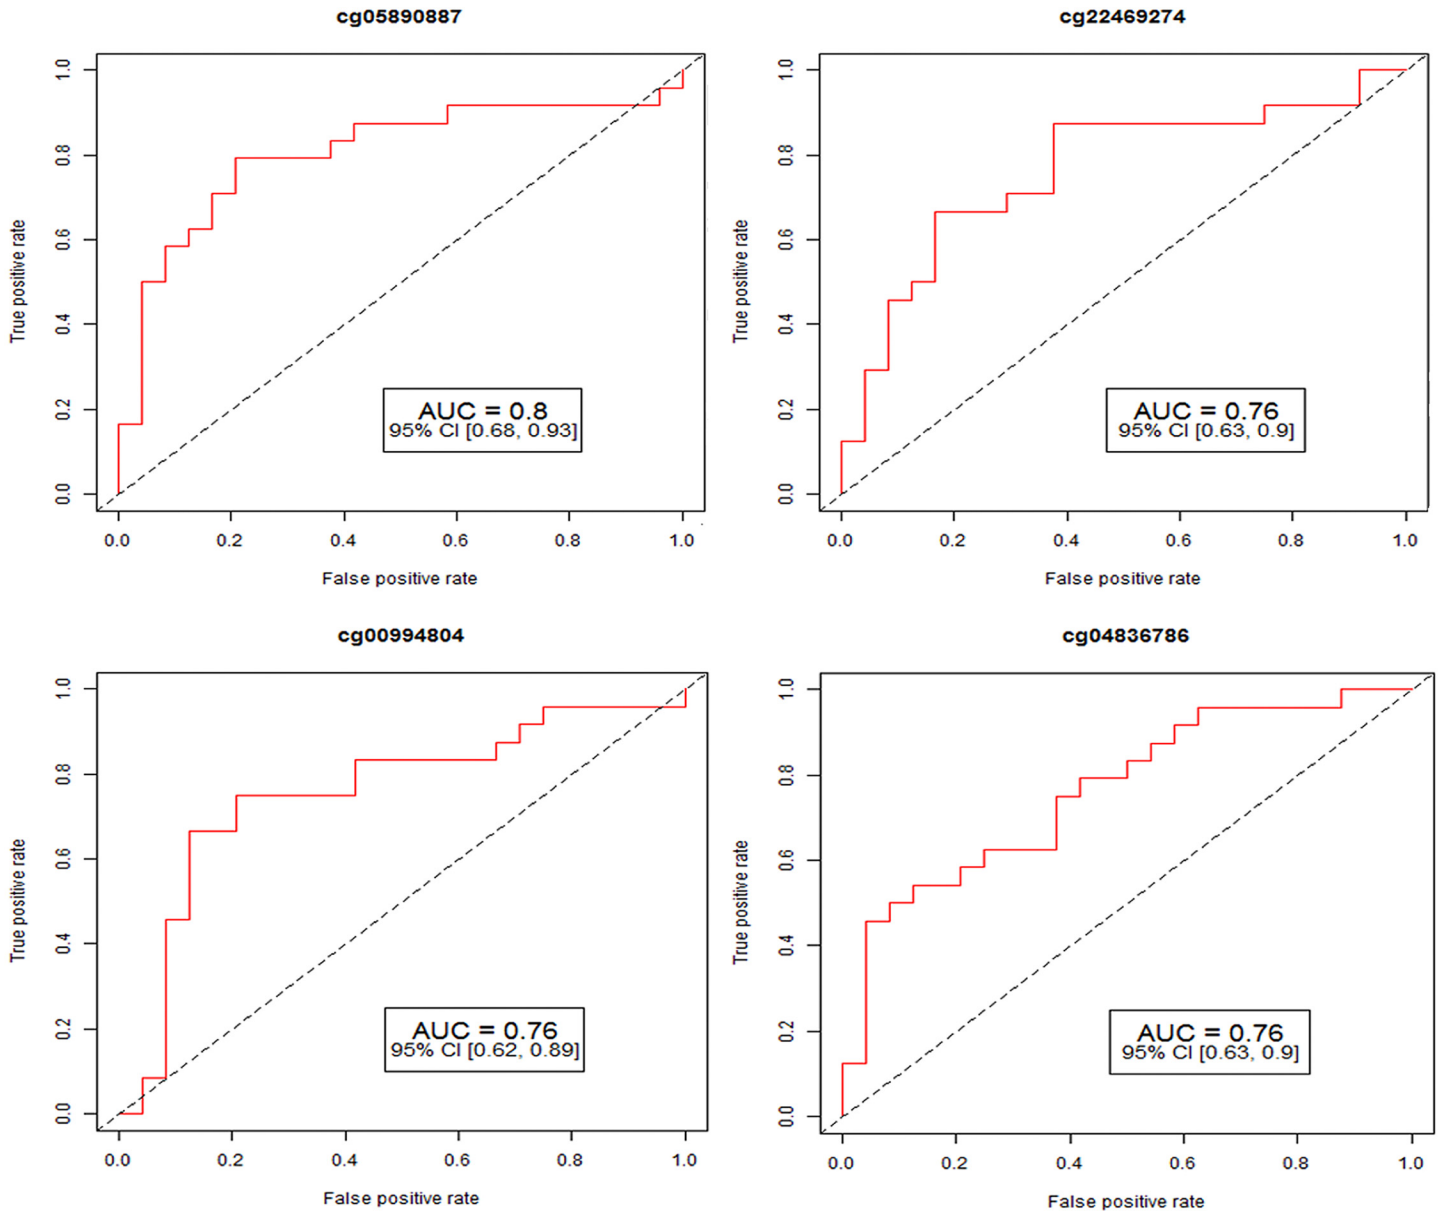

**Fig 2. Receiver operating characteristic (ROC) curve analysis of methylation profiles for four specific markers associated with aortic valve stenosis.** AUC: Area Under Curve; 95% CI: 95% Confidence Interval. Lower and upper confidence interval was given in parentheses. We have identified six CpG sites (cg16464924, cg05890887, cg26196700, cg22469274, cg00994804, cg04836786) among 52 differentially methylated genes that have ROC AUC  $\geq 0.75$ . At each locus, the FDR p-value for methylation difference between AVS subjects and controls was highly significantly different. Due to figure resolution, we have included only for four markers.

doi:10.1371/journal.pone.0154010.g002

*APOA5* (OMIM 606368) or apolipoprotein A5 is associated with plasma triglyceride levels, a major risk factor for coronary heart disease. Earlier association studies were conducted to examine the links between high-density lipoprotein genetics of various genes, including the *APOA5* gene, and aortic valve stenosis risk [43]. However due to limited sample size, their study did not yield strong associations. A significant correlation between the *APOA5* gene polymorphism and the levels of plasma high-density lipoprotein-cholesterol and increased risk for cardiovascular disease was previously identified [44, 45].

Another important gene identified by Gene Ontology analysis is proprotein convertase, subtilisin/Kexin-Type 9 (*PCSK9*, OMIM 607786). *PCSK9* is a serine protease that reduces both hepatic and extrahepatic low-density lipoprotein (LDL) receptor levels and increases plasma LDL cholesterol. Mutation in this gene leads to an increase in the LDL cholesterol level. Cohen et al [46] studied a large population and identified *PCSK9* gene variations associated with differing plasma levels of LDL cholesterol and the risk of coronary heart disease, including myocardial infarction and mortality from coronary disease.

Two other genes displaying altered methylation are Runt-related transcription factor 1 (*RUNX1*; OMIM 151385) on chromosome 21q22.12, and Thioredoxin reductase 2 (*TXNRD2*; OMIM 606448) on chromosome 22q11.21. Deletion of chromosome 21q21.1–22.12 including the *RUNX1* gene has been associated with multiple congenital anomalies and congenital heart defects including aortic stenosis [47, 48]. Thioredoxin reductase is directly involved in reducing proteins such as insulin. Experiments in mice demonstrated *TrxR2* is required for proper heart development [49]. Chromosome micro-deletions (del22q11) involving *TXNRD2* have also been associated with various congenital heart defects including aortic valve stenosis [50]. Helicase-Like transcription factor (*HLTF*; OMIM 603257), a gene that maps to chromosome 3, also plays an important role in the mouse heart development and function [51].

A number of other unrecognized genes identified in the genome-wide analysis are also potentially implicated in the pathogenesis of AVS, however the association between these genes and heart defects and putative mechanisms of action remain to be further explored.

In summary, we have identified alterations in DNA methylation in a number of genes involved in biological processes important to cardiac development in newborns with AVS, supporting the hypothesis that epigenetic modification may play a crucial role in the development of congenital heart defects such as AVS.

In the present study we have identified novel DNA-methylated genes and critical biological pathways that correlate with human aortic valve stenosis. We have demonstrated profound methylation differences in multiple CpG sites in these genes in AVS subjects. The methylation levels of individual CpG sites were used to calculate the area under the ROC curves as a measure of the accuracy of a putative diagnostic test with 59 CpG sites. Many of the identified CpG sites have a higher ROC AUC than 0.5; among them, the six CpGs with the highest AUC of more than 0.75 display strong diagnostic potential. Our overall results raise the possibility of using a large number of different marker combinations for effective detection of AVS. The results suggest that DNA methylation analysis is a molecular technique that might have the potential to be developed into a test for screening and diagnosis of AVS.

Finally the present study also determined that among 52 genes identified, many have not previously been reported in association with AVS. These results also suggest that the selected genes may be involved in the development of AVS by DNA methylation. The functional role of these genes or their potential as novel DNA methylation markers remains to be examined. An important limitation of the present study is that the findings are based on a relatively small number of subjects; however, these results can form the basis for specific hypotheses regarding AVS pathophysiology. Future larger studies based on this preliminary data may contain further clues for new approaches to non-invasive prenatal diagnosis and even prevention of this serious congenital heart malformation.

## Supporting Information

**S1 Table. Details of the AVS subject cohort and controls used in the present analysis (online only).**

(DOCX)

## Acknowledgments

We thank the Applied Genomics Technology Center, Wayne State University School of Medicine, Detroit, MI for bioinformatics support. We thank the Michigan Department of Community Health for specimens. We also thank Rose Callahan, Beaumont Health, for critical manuscript review and editing.

## Author Contributions

Conceived and designed the experiments: UR. Performed the experiments: UR. Analyzed the data: UR AZ. Contributed reagents/materials/analysis tools: SA. Wrote the paper: UR SA ZA-PS OT. Contributed to design of the study, supervised the clinical, experimental data interpretation and critically revised the manuscript: ROB-S.

## References

1. Khoshnood B, Lelong N, Houyel L, Thieulin AC, Jouannic JM, Magnier S, et al. Prevalence, timing of diagnosis and mortality of newborns with congenital heart defects: a population-based study. *Heart*. 2012; 98(22):1667–73. doi: [10.1136/heartjnl-2012-302543](https://doi.org/10.1136/heartjnl-2012-302543) PMID: [22888161](https://pubmed.ncbi.nlm.nih.gov/22888161/).
2. Reller MD, Strickland MJ, Riehle-Colarusso T, Mahle WT, Correa A. Prevalence of congenital heart defects in metropolitan Atlanta, 1998–2005. *The Journal of pediatrics*. 2008; 153(6):807–13. doi: [10.1016/j.jpeds.2008.05.059](https://doi.org/10.1016/j.jpeds.2008.05.059) PMID: [18657826](https://pubmed.ncbi.nlm.nih.gov/18657826/); PubMed Central PMCID: [PMC2613036](https://pubmed.ncbi.nlm.nih.gov/PMC2613036/).
3. Loffredo CA. Epidemiology of cardiovascular malformations: prevalence and risk factors. *American journal of medical genetics*. 2000; 97(4):319–25. PMID: [11376444](https://pubmed.ncbi.nlm.nih.gov/11376444/).
4. Roberts WC, Ko JM. Frequency by decades of unicuspid, bicuspid, and tricuspid aortic valves in adults having isolated aortic valve replacement for aortic stenosis, with or without associated aortic regurgitation. *Circulation*. 2005; 111(7):920–5. doi: [10.1161/01.CIR.0000155623.48408.C5](https://doi.org/10.1161/01.CIR.0000155623.48408.C5) PMID: [15710758](https://pubmed.ncbi.nlm.nih.gov/15710758/).
5. Pierpont ME, Basson CT, Benson DW Jr., Gelb BD, Giglia TM, Goldmuntz E, et al. Genetic basis for congenital heart defects: current knowledge: a scientific statement from the American Heart Association Congenital Cardiac Defects Committee, Council on Cardiovascular Disease in the Young: endorsed by the American Academy of Pediatrics. *Circulation*. 2007; 115(23):3015–38. doi: [10.1161/CIRCULATIONAHA.106.183056](https://doi.org/10.1161/CIRCULATIONAHA.106.183056) PMID: [17519398](https://pubmed.ncbi.nlm.nih.gov/17519398/).
6. Sheffield VC, Pierpont ME, Nishimura D, Beck JS, Burns TL, Berg MA, et al. Identification of a complex congenital heart defect susceptibility locus by using DNA pooling and shared segment analysis. *Human molecular genetics*. 1997; 6(1):117–21. PMID: [9002679](https://pubmed.ncbi.nlm.nih.gov/9002679/).
7. McGregor TL, Misri A, Bartlett J, Orabona G, Friedman RD, Sexton D, et al. Consanguinity mapping of congenital heart disease in a South Indian population. *PloS one*. 2010; 5(4):e10286. doi: [10.1371/journal.pone.0010286](https://doi.org/10.1371/journal.pone.0010286) PMID: [20422016](https://pubmed.ncbi.nlm.nih.gov/20422016/); PubMed Central PMCID: [PMC2858208](https://pubmed.ncbi.nlm.nih.gov/PMC2858208/).
8. Monteleone PL, Fagan LF. Possible X-linked congenital heart disease. *Circulation*. 1969; 39(5):611–4. PMID: [5787314](https://pubmed.ncbi.nlm.nih.gov/5787314/).
9. Hoffman JI, Kaplan S. The incidence of congenital heart disease. *Journal of the American College of Cardiology*. 2002; 39(12):1890–900. PMID: [12084585](https://pubmed.ncbi.nlm.nih.gov/12084585/).
10. Patel SS, Burns TL. Nongenetic risk factors and congenital heart defects. *Pediatric cardiology*. 2013; 34(7):1535–55. doi: [10.1007/s00246-013-0775-4](https://doi.org/10.1007/s00246-013-0775-4) PMID: [23963188](https://pubmed.ncbi.nlm.nih.gov/23963188/).
11. Probst V, Le Scouarnec S, Legendre A, Jousseau V, Jaafar P, Nguyen JM, et al. Familial aggregation of calcific aortic valve stenosis in the western part of France. *Circulation*. 2006; 113(6):856–60. doi: [10.1161/CIRCULATIONAHA.105.569467](https://doi.org/10.1161/CIRCULATIONAHA.105.569467) PMID: [16461814](https://pubmed.ncbi.nlm.nih.gov/16461814/).
12. Le Gal G, Bertault V, Bezon E, Cornily JC, Barra JA, Blanc JJ. Heterogeneous geographic distribution of patients with aortic valve stenosis: arguments for new aetiological hypothesis. *Heart*. 2005; 91(2):247–9. doi: [10.1136/hrt.2004.037093](https://doi.org/10.1136/hrt.2004.037093) PMID: [15657257](https://pubmed.ncbi.nlm.nih.gov/15657257/); PubMed Central PMCID: [PMC1768671](https://pubmed.ncbi.nlm.nih.gov/PMC1768671/).
13. Friedman WF. Aortic stenosis. In Adama FH, Emmnoulides GC (Eds) *Heart diseases in infants, children and adolescents including the fetus and young adults* 5th edition Baltimore MD Williams & Wilkins 1995.
14. McBride KL, Marengo L, Canfield M, Langlois P, Fixler D, Belmont JW. Epidemiology of noncomplex left ventricular outflow tract obstruction malformations (aortic valve stenosis, coarctation of the aorta, hypoplastic left heart syndrome) in Texas, 1999–2001. *Birth defects research Part A, Clinical and molecular teratology*. 2005; 73(8):555–61. doi: [10.1002/bdra.20169](https://doi.org/10.1002/bdra.20169) PMID: [16007587](https://pubmed.ncbi.nlm.nih.gov/16007587/); PubMed Central PMCID: [PMC1361303](https://pubmed.ncbi.nlm.nih.gov/PMC1361303/).

15. Csaky-Szunyogh M, Vereczkey A, Kosa Z, Gerencser B, Czeizel AE. Risk factors in the origin of congenital left-ventricular outflow-tract obstruction defects of the heart: a population-based case-control study. *Pediatric cardiology*. 2014; 35(1):108–20. doi: [10.1007/s00246-013-0749-6](https://doi.org/10.1007/s00246-013-0749-6) PMID: [23843102](https://pubmed.ncbi.nlm.nih.gov/23843102/).
16. Abuhamad A, Chaoui RC. A practical guide to fetal echocardiography. Normal and abnormal hearts. Second edition 2010: LippincottWilliams and Wilkins Philadelphia, PA. 2010.
17. Kehler L, Biro O, Lazar L, Rigo J Jr., Nagy B. Elevated hsa-miR-99a levels in maternal plasma may indicate congenital heart defects. *Biomed Rep*. 2015; 3(6):869–73. doi: [10.3892/br.2015.510](https://doi.org/10.3892/br.2015.510) PMID: [26623032](https://pubmed.ncbi.nlm.nih.gov/26623032/); PubMed Central PMCID: PMC4660590.
18. Czeizel AE, Dobo M, Vargha P. Hungarian cohort-controlled trial of periconceptional multivitamin supplementation shows a reduction in certain congenital abnormalities. *Birth defects research Part A, Clinical and molecular teratology*. 2004; 70(11):853–61. doi: [10.1002/bdra.20086](https://doi.org/10.1002/bdra.20086) PMID: [15523663](https://pubmed.ncbi.nlm.nih.gov/15523663/).
19. Marti-Carvajal AJ, Sola I, Lathyris D, Salanti G. Homocysteine lowering interventions for preventing cardiovascular events. *The Cochrane database of systematic reviews*. 2009;(4):CD006612. doi: [10.1002/14651858.CD006612.pub2](https://doi.org/10.1002/14651858.CD006612.pub2) PMID: [19821378](https://pubmed.ncbi.nlm.nih.gov/19821378/).
20. Bahado-Singh RO, Zaffra R, Albayarak S, Chelliah A, Bolinjar R, Turkoglu O, et al. Epigenetic markers for newborn congenital heart defect (CHD). *J Matern Fetal Neonatal Med*. 2015:1–7.
21. Ailes EC, Gilboa SM, Riehle-Colarusso T, Johnson CY, Hobbs CA, Correa A, et al. Prenatal diagnosis of nonsyndromic congenital heart defects. *Prenatal diagnosis*. 2014; 34(3):214–22. doi: [10.1002/pd.4282](https://doi.org/10.1002/pd.4282) PMID: [24222433](https://pubmed.ncbi.nlm.nih.gov/24222433/).
22. Knowles R, Griebbs I, Dezateux C, Brown J, Bull C, Wren C. Newborn screening for congenital heart defects: a systematic review and cost-effectiveness analysis. *Health technology assessment*. 2005; 9(44):1–152, iii-iv. PMID: [16297355](https://pubmed.ncbi.nlm.nih.gov/16297355/).
23. Joo JE, Wong EM, Baglietto L, Jung CH, Tsimiklis H, Park DJ, et al. The use of DNA from archival dried blood spots with the Infinium HumanMethylation450 array. *BMC Biotechnol*. 2013; 13:23. doi: [10.1186/1472-6750-13-23](https://doi.org/10.1186/1472-6750-13-23) PMID: [23497093](https://pubmed.ncbi.nlm.nih.gov/23497093/); PubMed Central PMCID: PMC3610215.
24. Wong N, Morley R, Saffery R, Craig J. Archived Guthrie blood spots as a novel source for quantitative DNA methylation analysis. *Biotechniques*. 2008; 45(4):423–4, 6, 8 passim. doi: [10.2144/000112945](https://doi.org/10.2144/000112945) PMID: [18855769](https://pubmed.ncbi.nlm.nih.gov/18855769/).
25. Docherty LE, Rezwani FI, Poole RL, Jagoe H, Lake H, Lockett GA, et al. Genome-wide DNA methylation analysis of patients with imprinting disorders identifies differentially methylated regions associated with novel candidate imprinted genes. *Journal of medical genetics*. 2014; 51(4):229–38. doi: [10.1136/jmedgenet-2013-102116](https://doi.org/10.1136/jmedgenet-2013-102116) PMID: [24501229](https://pubmed.ncbi.nlm.nih.gov/24501229/); PubMed Central PMCID: PMC3963529.
26. Pan H, Chen L, Dogra S, Teh AL, Tan JH, Lim YI, et al. Measuring the methylome in clinical samples: improved processing of the Infinium Human Methylation450 BeadChip Array. *Epigenetics: official journal of the DNA Methylation Society*. 2012; 7(10):1173–87. doi: [10.4161/epi.22102](https://doi.org/10.4161/epi.22102) PMID: [22964528](https://pubmed.ncbi.nlm.nih.gov/22964528/); PubMed Central PMCID: PMC3469459.
27. Liu Y, Aryee MJ, Padyukov L, Fallin MD, Hesselberg E, Runarsson A, et al. Epigenome-wide association data implicate DNA methylation as an intermediary of genetic risk in rheumatoid arthritis. *Nat Biotechnol*. 2013; 31(2):142–7. doi: [10.1038/nbt.2487](https://doi.org/10.1038/nbt.2487) PMID: [23334450](https://pubmed.ncbi.nlm.nih.gov/23334450/); PubMed Central PMCID: PMC3598632.
28. Chen YA, Lemire M, Choufani S, Butcher DT, Grafodatskaya D, Zanke BW, et al. Discovery of cross-reactive probes and polymorphic CpGs in the Illumina Infinium HumanMethylation450 microarray. *Epigenetics*. 2013; 8(2):203–9. doi: [10.4161/epi.23470](https://doi.org/10.4161/epi.23470) PMID: [23314698](https://pubmed.ncbi.nlm.nih.gov/23314698/); PubMed Central PMCID: PMC3592906.
29. Wilhelm-Benartzi CS, Koestler DC, Karagas MR, Flanagan JM, Christensen BC, Kelsey KT, et al. Review of processing and analysis methods for DNA methylation array data. *Br J Cancer*. 2013; 109(6):1394–402. doi: [10.1038/bjc.2013.496](https://doi.org/10.1038/bjc.2013.496) PMID: [23982603](https://pubmed.ncbi.nlm.nih.gov/23982603/); PubMed Central PMCID: PMC3777004.
30. Daca-Roszak P, Pfeifer A, Zebracka-Gala J, Rusinek D, Szybinska A, Jarzab B, et al. Impact of SNPs on methylation readouts by Illumina Infinium HumanMethylation450 BeadChip Array: implications for comparative population studies. *BMC Genomics*. 2015; 16(1):1003. doi: [10.1186/s12864-015-2202-0](https://doi.org/10.1186/s12864-015-2202-0) PMID: [26607064](https://pubmed.ncbi.nlm.nih.gov/26607064/); PubMed Central PMCID: PMC4659175.
31. Gu. Z. ComplexHeatmap: Making Complex Heatmaps. R package version 1.6.0. <https://github.com/jokergoo/ComplexHeatmap>. 2015.
32. Altorok N, Tsou PS, Coit P, Khanna D, Sawalha AH. Genome-wide DNA methylation analysis in dermal fibroblasts from patients with diffuse and limited systemic sclerosis reveals common and subset-specific DNA methylation aberrancies. *Annals of the rheumatic diseases*. 2014. doi: [10.1136/annrheumdis-2014-205303](https://doi.org/10.1136/annrheumdis-2014-205303) PMID: [24812288](https://pubmed.ncbi.nlm.nih.gov/24812288/).
33. Benjamini Y, Hochberg Y. Controlling the False Discovery Rate: a Practical and Powerful Approach to Multiple Testing. *J R Statist Soc B*. 1995; 57:289–300.

34. Huang da W, Sherman BT, Lempicki RA. Systematic and integrative analysis of large gene lists using DAVID bioinformatics resources. *Nature protocols*. 2009; 4(1):44–57. doi: [10.1038/nprot.2008.211](https://doi.org/10.1038/nprot.2008.211) PMID: [19131956](https://pubmed.ncbi.nlm.nih.gov/19131956/).
35. Huang da W, Sherman BT, Lempicki RA. Bioinformatics enrichment tools: paths toward the comprehensive functional analysis of large gene lists. *Nucleic acids research*. 2009; 37(1):1–13. doi: [10.1093/nar/gkn923](https://doi.org/10.1093/nar/gkn923) PMID: [19033363](https://pubmed.ncbi.nlm.nih.gov/19033363/); PubMed Central PMCID: PMC2615629.
36. Sheng W, Qian Y, Zhang P, Wu Y, Wang H, Ma X, et al. Association of promoter methylation statuses of congenital heart defect candidate genes with Tetralogy of Fallot. *Journal of translational medicine*. 2014; 12:31. doi: [10.1186/1479-5876-12-31](https://doi.org/10.1186/1479-5876-12-31) PMID: [24479926](https://pubmed.ncbi.nlm.nih.gov/24479926/); PubMed Central PMCID: PMC3915623.
37. Hutter CM, Austin MA, Humphries SE. Familial hypercholesterolemia, peripheral arterial disease, and stroke: a HuGE minireview. *Am J Epidemiol*. 2004; 160(5):430–5. doi: [10.1093/aje/kwh238](https://doi.org/10.1093/aje/kwh238) PMID: [15321839](https://pubmed.ncbi.nlm.nih.gov/15321839/).
38. Austin MA, Hutter CM, Zimmern RL, Humphries SE. Familial hypercholesterolemia and coronary heart disease: a HuGE association review. *Am J Epidemiol*. 2004; 160(5):421–9. doi: [10.1093/aje/kwh237](https://doi.org/10.1093/aje/kwh237) PMID: [15321838](https://pubmed.ncbi.nlm.nih.gov/15321838/).
39. Rabus MB, Kayalar N, Sareyyupoglu B, Erkin A, Kirali K, Yakut C. Hypercholesterolemia association with aortic stenosis of various etiologies. *J Card Surg*. 2009; 24(2):146–50. doi: [10.1111/j.1540-8191.2009.00814.x](https://doi.org/10.1111/j.1540-8191.2009.00814.x) PMID: [19267822](https://pubmed.ncbi.nlm.nih.gov/19267822/).
40. Chui MC, Newby DE, Panarelli M, Bloomfield P, Boon NA. Association between calcific aortic stenosis and hypercholesterolemia: is there a need for a randomized controlled trial of cholesterol-lowering therapy? *Clin Cardiol*. 2001; 24(1):52–5. PMID: [11195607](https://pubmed.ncbi.nlm.nih.gov/11195607/).
41. Li Y. Functional analysis of Dusp27, a novel target gene of the JAK1/STAT1 pathway, in myogenesis. Thesis (PhD)—Hong Kong University of Science and Technology, . 2011.
42. Arrington CB, Bleyl SB, Matsunami N, Bonnell GD, Otterud BE, Nielsen DC, et al. Exome analysis of a family with pleiotropic congenital heart disease. *Circ Cardiovasc Genet*. 2012; 5(2):175–82. doi: [10.1161/CIRCGENETICS.111.961797](https://doi.org/10.1161/CIRCGENETICS.111.961797) PMID: [22337856](https://pubmed.ncbi.nlm.nih.gov/22337856/); PubMed Central PMCID: PMC3329568.
43. Arsenault BJ, Dube MP, Brodeur MR, de Oliveira Moraes AB, Lavoie V, Kernaeguen AE, et al. Evaluation of links between high-density lipoprotein genetics, functionality, and aortic valve stenosis risk in humans. *Arterioscler Thromb Vasc Biol*. 2014; 34(2):457–62. doi: [10.1161/ATVBAHA.113.302730](https://doi.org/10.1161/ATVBAHA.113.302730) PMID: [24334872](https://pubmed.ncbi.nlm.nih.gov/24334872/).
44. Liu HK, Wang CT, Zhang SZ, Xiao CY, Li XF, Zhang KL, et al. [Association of APOA5 gene single nucleotide polymorphism with levels of lipids and coronary heart disease in Chinese]. *Zhonghua Yi Xue Yi Chuan Xue Za Zhi*. 2004; 21(4):335–8. PMID: [15300628](https://pubmed.ncbi.nlm.nih.gov/15300628/).
45. Wang J, Ban MR, Kennedy BA, Anand S, Yusuf S, Huff MW, et al. APOA5 genetic variants are markers for classic hyperlipoproteinemia phenotypes and hypertriglyceridemia. *Nat Clin Pract Cardiovasc Med*. 2008; 5(11):730–7. doi: [10.1038/ncpcardio1326](https://doi.org/10.1038/ncpcardio1326) PMID: [18779834](https://pubmed.ncbi.nlm.nih.gov/18779834/).
46. Cohen JC, Boerwinkle E, Mosley TH Jr., Hobbs HH. Sequence variations in PCSK9, low LDL, and protection against coronary heart disease. *N Engl J Med*. 2006; 354(12):1264–72. doi: [10.1056/NEJMoa054013](https://doi.org/10.1056/NEJMoa054013) PMID: [16554528](https://pubmed.ncbi.nlm.nih.gov/16554528/).
47. Click ES, Cox B, Olson SB, Grompe M, Akkari Y, Moreau LA, et al. Fanconi anemia-like presentation in an infant with constitutional deletion of 21q including the RUNX1 gene. *Am J Med Genet A*. 2011; 155A(7):1673–9. doi: [10.1002/ajmg.a.34024](https://doi.org/10.1002/ajmg.a.34024) PMID: [21626672](https://pubmed.ncbi.nlm.nih.gov/21626672/).
48. Lindstrand A, Malmgren H, Sahlen S, Schoumans J, Nordgren A, Ergander U, et al. Detailed molecular and clinical characterization of three patients with 21q deletions. *Clin Genet*. 2010; 77(2):145–54. doi: [10.1111/j.1399-0004.2009.01289.x](https://doi.org/10.1111/j.1399-0004.2009.01289.x) PMID: [19863549](https://pubmed.ncbi.nlm.nih.gov/19863549/).
49. Conrad M, Jakupoglu C, Moreno SG, Lippl S, Banjac A, Schneider M, et al. Essential role for mitochondrial thioredoxin reductase in hematopoiesis, heart development, and heart function. *Mol Cell Biol*. 2004; 24(21):9414–23. doi: [10.1128/MCB.24.21.9414-9423.2004](https://doi.org/10.1128/MCB.24.21.9414-9423.2004) PMID: [15485910](https://pubmed.ncbi.nlm.nih.gov/15485910/); PubMed Central PMCID: PMC522221.
50. Lindsay EA. Chromosomal microdeletions: dissecting del22q11 syndrome. *Nat Rev Genet*. 2001; 2(11):858–68. doi: [10.1038/35098574](https://doi.org/10.1038/35098574) PMID: [11715041](https://pubmed.ncbi.nlm.nih.gov/11715041/).
51. Helmer RA, Martinez-Zaguilan R, Dertien JS, Fulford C, Foreman O, Peiris V, et al. Helicase-like transcription factor (Hlf) regulates G2/M transition, Wt1/Gata4/Hif-1a cardiac transcription networks, and collagen biogenesis. *PLoS One*. 2013; 8(11):e80461. doi: [10.1371/journal.pone.0080461](https://doi.org/10.1371/journal.pone.0080461) PMID: [24278285](https://pubmed.ncbi.nlm.nih.gov/24278285/); PubMed Central PMCID: PMC3835564.
